# Supplementary material for: Climate change impact on seaweed meadow distribution in the North Atlantic rocky intertidal
Source: PubMed Central journal article supplement (PMC3678489; doi:10.1002/ece3.541), 2013-04-12

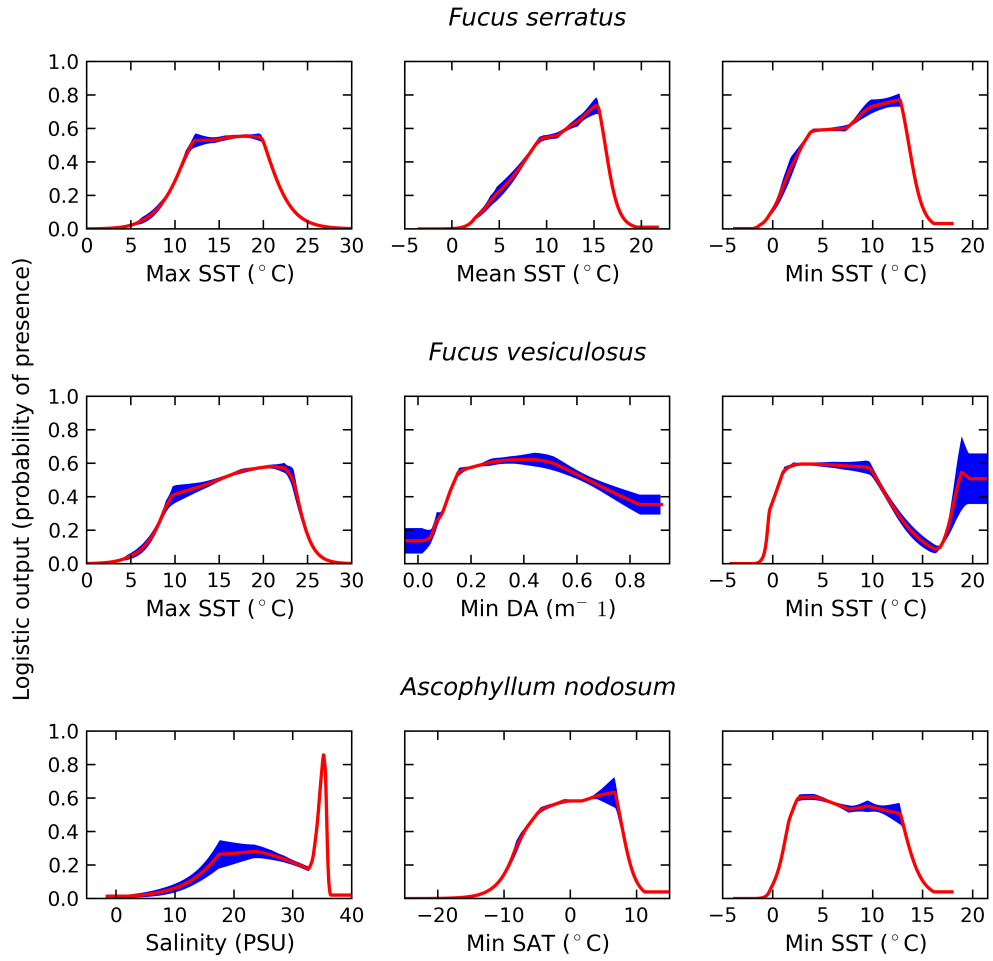

Supplement: ece30003-1356-SD5.pdf [file ece30003-1356-SD5.pdf]
